# Supplementary material for: Synergistic stabilization of a double mutant in chymotrypsin inhibitor 2 from a library screen in E. coli
Source: PubMed Central journal article supplement (PMC8373930; doi:10.1038/s42003-021-02490-7), 2021-08-18
Supplement: 42003_2021_2490_MOESM2_ESM.pdf [file 42003_2021_2490_MOESM2_ESM.pdf]

# Supplementary Information

## **Synergistic stabilization of a double mutant in chymotrypsin inhibitor 2 from a library screen in *E. coli***

Louise Hamborg<sup>1,2</sup>, Daniele Granata<sup>1</sup>, Johan G. Olsen<sup>1</sup>, Jennifer Virginia Roche<sup>1</sup>, Lasse Ebdrup Pedersen<sup>2</sup>, Alex Toftgaard Nielsen<sup>2</sup>, Kresten Lindorff-Larsen<sup>1</sup>, Kaare Teilum<sup>1#</sup>

<sup>1</sup>Structural Biology and NMR Laboratory and the Linderstrøm-Lang Centre for Protein Science, Department of Biology, University of Copenhagen, Ole Maaloes Vej 5, 2200 Copenhagen N, Denmark

<sup>2</sup>The Novo Nordisk Foundation Center for Biosustainability, Technical University of Denmark, Kemitorvet, 2800 Kgs. Lyngby, Denmark

#Corresponding author

Phone: +45 35 32 20 29

Postal Address: Ole Maaloes Vej 5, 2200 Copenhagen N, Denmark

Email: [kaare.teilum@bio.ku.dk](mailto:kaare.teilum@bio.ku.dk)



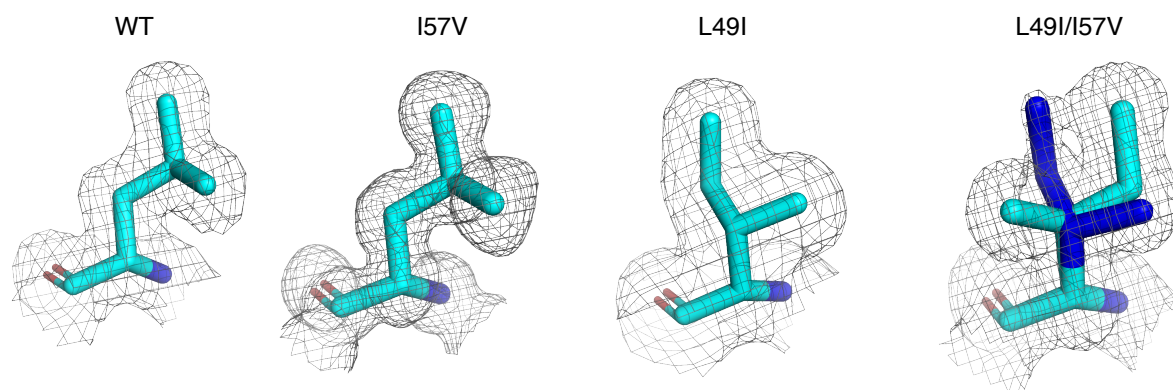

**Supplementary Figure 2** Electron density around the residue at position 49 in the variant of Cl2 indicated above each picture. The  $2F_o - F_c$  electron density maps of the structures are plotted at  $0.7\sigma$ .

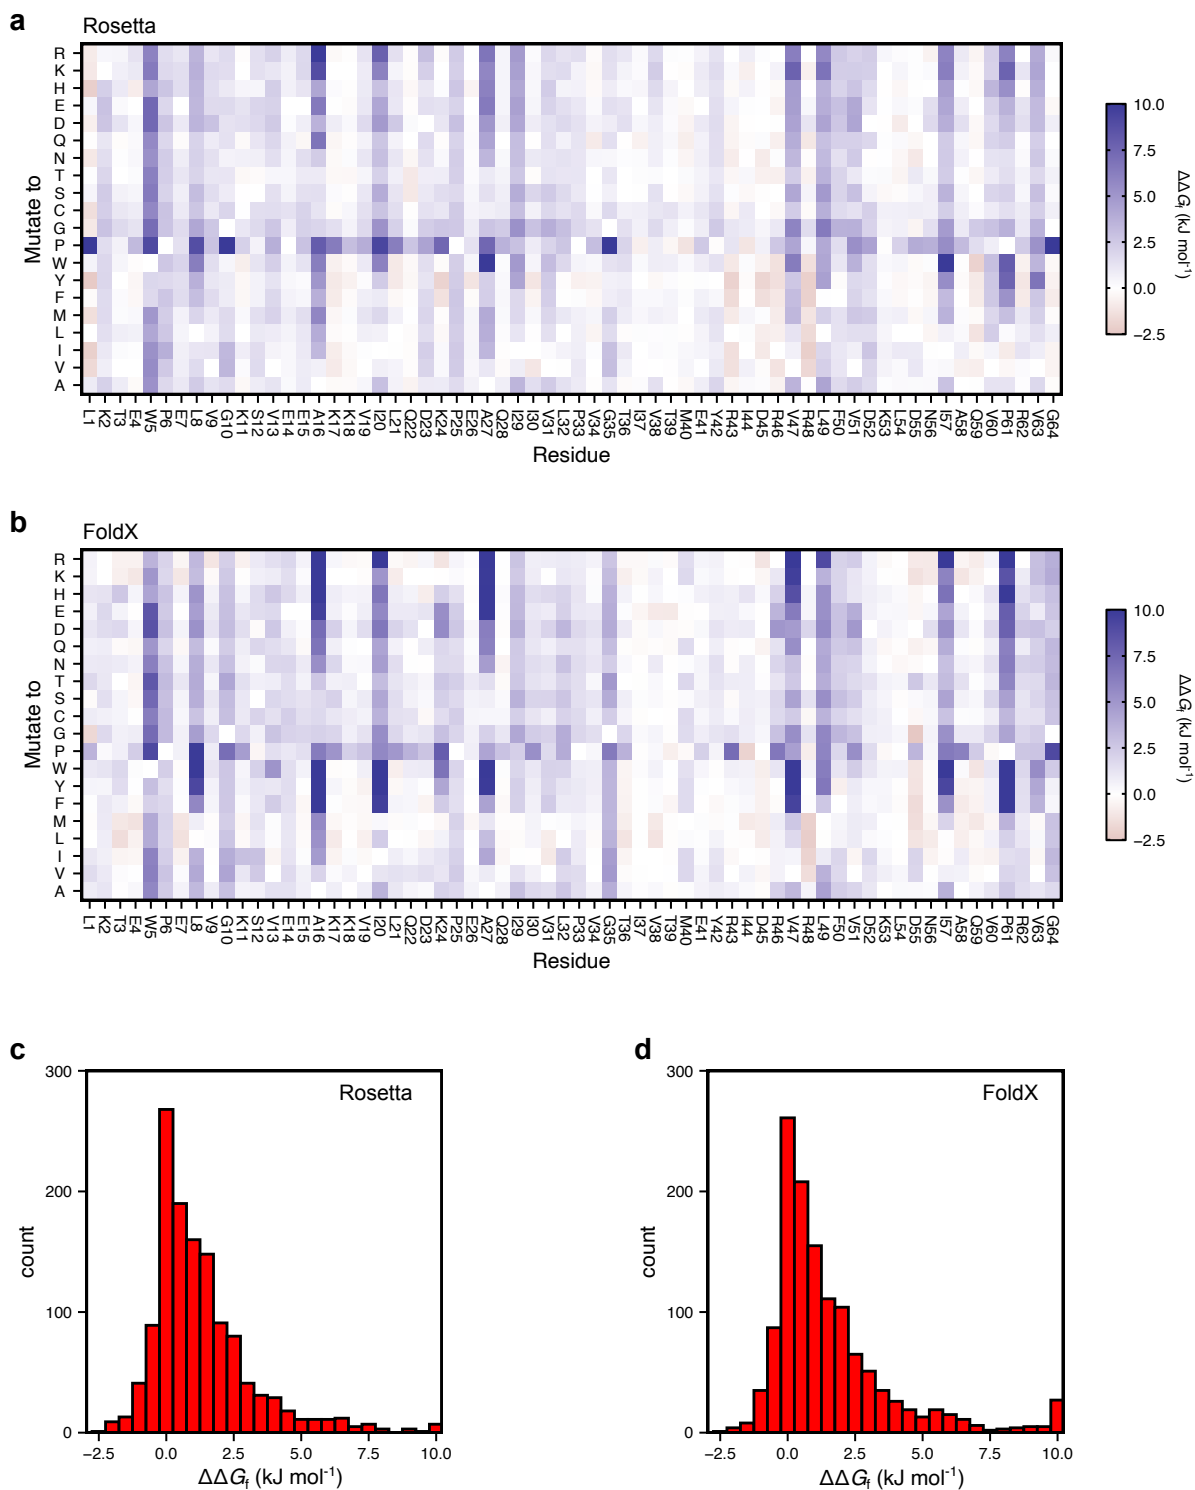

**Supplementary Figure 3** Stability predictions of CI2 single point mutations. Using the original crystal structure of CI2 (PDB-code: 2CI2) we calculated the change in stability,  $\Delta\Delta G_f$ , for each point mutation using either (a) Rosetta or (b) FoldX. The value of the stability change is indicated with a colour scale from red (stabilizing) to blue (destabilizing) as indicated to the right of the figure. (c-d) The distributions of the changes in stability,  $\Delta\Delta G_f$  from panel (a) and (b), respectively.

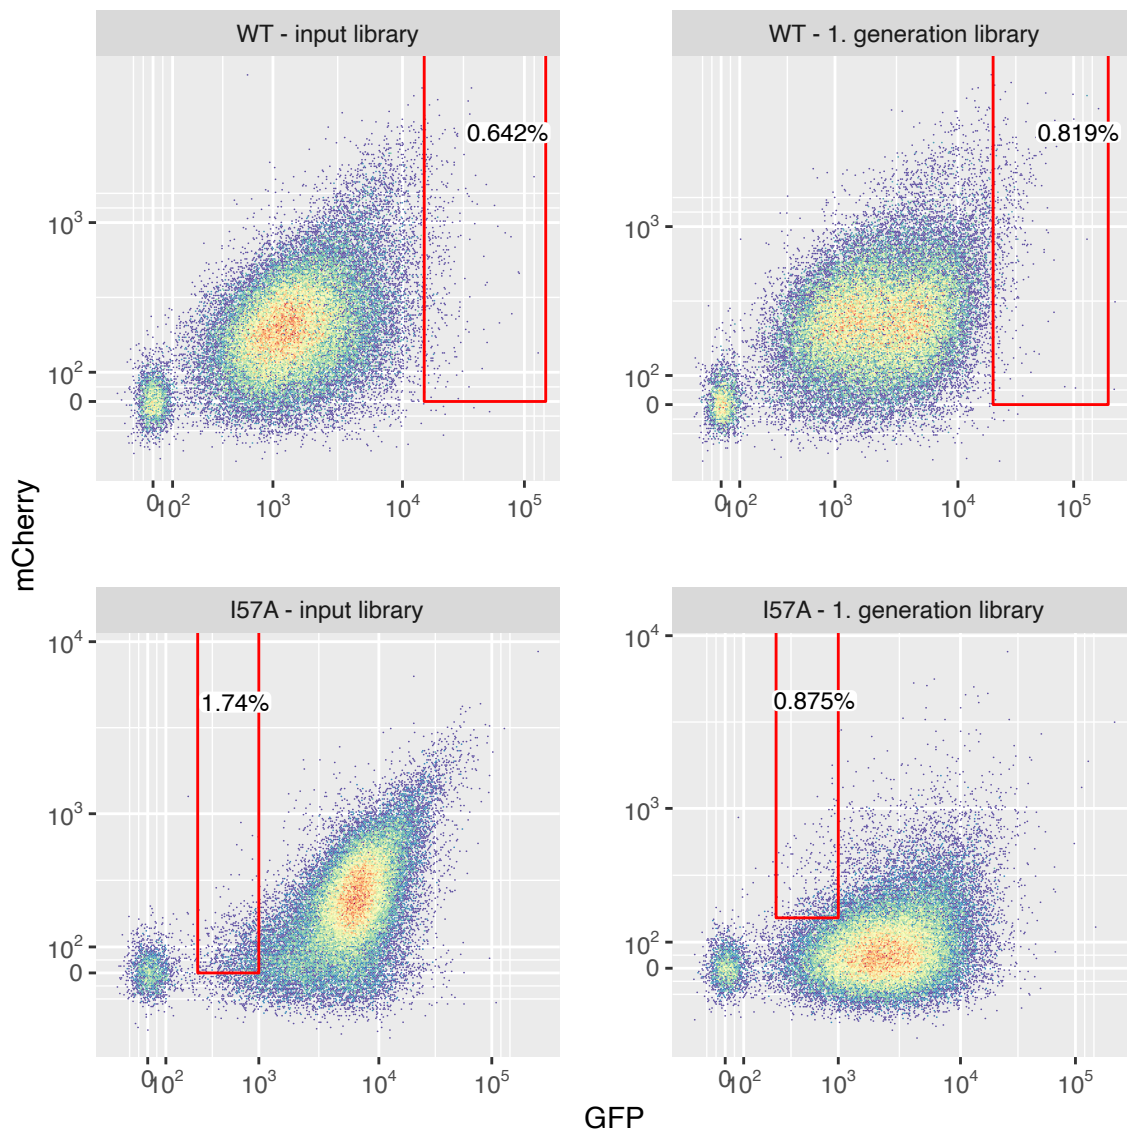

**Supplementary Figure 4** Gating strategy for FACS sorting. The gates were set to collect 100.000 cells from the ~1% highest GFP fluorescence in the WT libraries or 100.000 cells from the ~1% lowest GFP fluorescence in the I57A libraries. In the second round of sorting I57A clones with mCherry signal above 300 are selected.

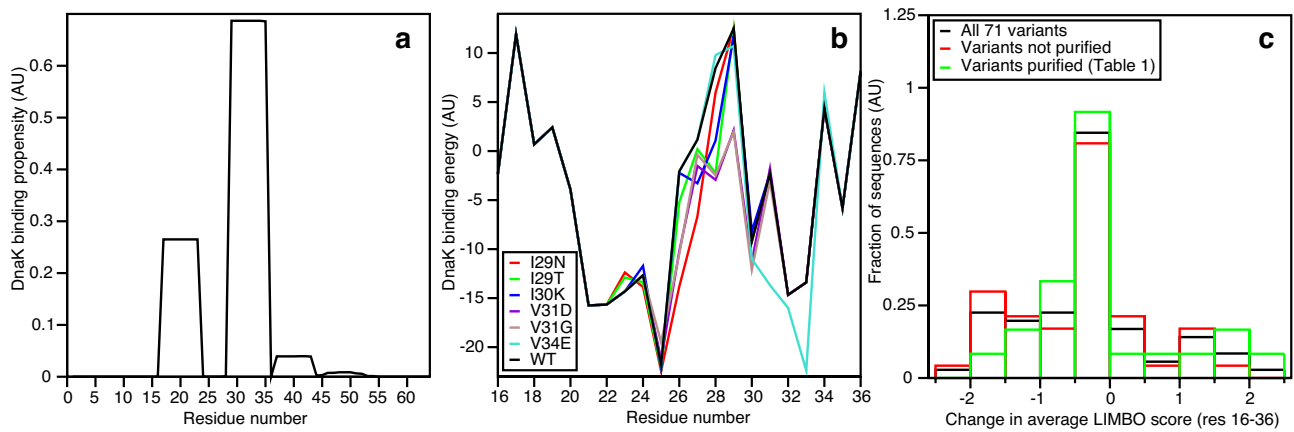

**Supplementary Figure 5** Propensity for DnaK binding to CI2 as predicted by the Limbo algorithm. **(a)** Sequence dependent DnaK propensity score for wild-type CI2. **(b)** Variation in DnaK binding energy for single point mutations in the major DnaK binding region of CI2. **(c)** Distributions of changes in DnaK binding scores of CI2 variants relative to the score of wild-type CI2, for all 71 initially selected variants (black), those variants that failed to be purified (red), and those that were purified and used for stability measurements (green).
