# Supplementary material for: Synergistic stabilization of a double mutant in chymotrypsin inhibitor 2 from a library screen in E. coli
Source: PubMed Central journal article supplement (PMC8373930; doi:10.1038/s42003-021-02490-7), 2021-08-18
Supplement: 42003_2021_2490_MOESM3_ESM.pdf [file 42003_2021_2490_MOESM3_ESM.pdf]

### **Description of Additional Supplementary Files**

File Name: Supplementary Data 1

Description: zip.file with FACS data used for Fig 1a

File Name: Supplementary Data 2

Description: excel-file with source data for Fig 1b

File Name: Supplementary Data 3

Description: excel-file with source data for Fig 1c

File Name: Supplementary Data 4

Description: excel-file with source data for Fig 2

File Name: Supplementary Data 5

Description: excel-file with source data for Fig 3a

File Name: Supplementary Data 6

Description: excel-file with source data for Fig 3b
